# Supplementary material for: Implementation of Evidence-based Asthma Interventions in Post-Katrina New Orleans: The Head-off Environmental Asthma in Louisiana (HEAL) Study
Source: PubMed Central journal article supplement (PMC3556603; doi:10.1289/ehp.1104242), 2012-08-15
Supplement: ehp.1104242.s001.pdf [file ehp.1104242.s001.pdf]

## **Supplemental Material**

Implementation of Evidence-based Asthma Interventions in Post-Katrina New Orleans: The Head-off Environmental Asthma in Louisiana (HEAL) Study

Herman Mitchell, Richard D. Cohn, Jeremy Wildfire, Eleanor Thornton, Suzanne Kennedy, Jane M. El-Dahr, Patricia C. Chulada, Mosanda M. Mvula, L. Faye Grimsley, Maureen Y. Lichtveld, LuAnn E. White, Yvonne M. Sterling, Kevin U. Stephens, Sr., William J. Martin II

## Contents

|                                                                                                                                                              |   |
|--------------------------------------------------------------------------------------------------------------------------------------------------------------|---|
| Supplemental Material, Table S1. Baseline characteristics by timing of the first contact with an asthma counselor .....                                      | 3 |
| Supplemental Material, Table S2. Symptoms at 6 months, exposures, and allergic characteristics by timing of the first contact with an asthma counselor ..... | 4 |
| Supplemental Material, Table S3. Differences in Maximum Symptom Days (MSD) according to intervention status at 6 months and baseline characteristics.....    | 5 |

**Supplemental Table 1 – Baseline characteristics by timing of the first contact with an asthma counselor**

|                                      | Contact with asthma counselor Before 6 Months |             | <i>p</i> |
|--------------------------------------|-----------------------------------------------|-------------|----------|
|                                      | Yes (N=80)                                    | No (N=73)   |          |
| Symptoms                             | 6.6 ± 5.0                                     | 6.0 ± 4.7   | 0.44     |
| Parish                               |                                               |             | 0.07     |
| Orleans                              | 48/80 (60%)                                   | 54/73 (74%) |          |
| Jefferson                            | 32/80 (40%)                                   | 19/73 (26%) |          |
| Enrollment Season                    |                                               |             | <0.001   |
| Spring 2007                          | 5/80 (6%)                                     | 11/73 (15%) |          |
| Summer 2007                          | 13/80 (16%)                                   | 31/73 (42%) |          |
| Fall 2007                            | 26/80 (33%)                                   | 24/73 (33%) |          |
| Winter 2007                          | 29/80 (36%)                                   | 4/73 (6%)   |          |
| Spring 2008                          | 7/80 (9%)                                     | 3/73 (4%)   |          |
| Race/ethnicity                       |                                               |             | 0.33     |
| African American                     | 49/80 (61%)                                   | 51/73 (70%) |          |
| Hispanic                             | 5/80 (6%)                                     | 6/73 (8%)   |          |
| Other                                | 26/80 (33%)                                   | 16/73 (22%) |          |
| Income <\$15,000                     | 18/74 (24%)                                   | 17/68 (25%) | 0.93     |
| Gender - Female                      | 34/80 (43%)                                   | 36/73 (49%) | 0.40     |
| Lung function                        |                                               |             |          |
| FEV1 % predicted                     | 91.2 ± 86.0                                   | 90.2 ± 83.9 | 0.81     |
| FEV1/FVC                             | 78.0 ± 11.2                                   | 78.8 ± 8.7  | 0.74     |
| Taking Inhaled Corticosteroids       | 46/80 (58%)                                   | 41/73 (56%) | 0.87     |
| Mold levels (spores/m <sup>3</sup> ) |                                               |             |          |
| Outdoor total                        | 2322 (378)                                    | 6475 (1235) | <0.001   |
| Indoor total                         | 388 (45)                                      | 618 (105)   | 0.03     |
| IgE (serum)                          |                                               |             |          |
| Total IgE (kU/L)                     | 208 (37)                                      | 207 (36)    | 0.99     |
| Positive Mold-specific IgE           | 34/77 (44%)                                   | 31/69 (45%) | 0.93     |
| Allergens in dust                    |                                               |             |          |
| <i>Alternaria</i> >10 µg/g           | 52/80 (65%)                                   | 42/72 (58%) | 0.40     |
| Detectable roach                     | 14/80 (18%)                                   | 17/72 (24%) | 0.35     |
| Detectable dust mite                 | 29/80 (36%)                                   | 24/72 (33%) | 0.71     |
| Detectable mouse                     | 45/80 (56%)                                   | 47/72 (65%) | 0.26     |
| Skin Test Result                     |                                               |             |          |
| <i>Alternaria</i>                    | 42/80 (53%)                                   | 39/71 (55%) | 0.77     |
| Roach                                | 411/80 (51%)                                  | 33/71 (46%) | 0.56     |
| Dust Mite                            | 50/80 (63%)                                   | 50/71 (70%) | 0.30     |
| Mouse                                | 20/80 (25%)                                   | 19/71 (27%) | 0.81     |

Values are counts (percentages), mean ± standard deviation, or geometric mean (geometric standard deviation).

**Supplemental Table 2 –Symptoms at 6 months, exposures and allergic characteristics by timing of the first contact with an asthma counselor**

|                                      | Contact with Asthma Counselor Before 6 Months |                  |    |                 | Difference | <i>p</i> |
|--------------------------------------|-----------------------------------------------|------------------|----|-----------------|------------|----------|
|                                      | N                                             | Yes<br>Mean (SE) | N  | No<br>Mean (SE) |            |          |
| Maximum Symptom Days                 | 80                                            | 2.25 (0.4)       | 73 | 4.56 (0.5)      | -2.31      | <0.001   |
| Mold levels (spores/m <sup>3</sup> ) |                                               |                  |    |                 |            |          |
| Outdoor total                        | 86                                            | 2166 (365.2)     | 49 | 1818 (412.0)    | -348       | 0.55     |
| Indoor total                         | 87                                            | 456 (97.4)       | 49 | 320 (97.4)      | -136       |          |
| Allergens in dust                    |                                               |                  |    |                 |            |          |
| <i>Alternaria</i> >10 µg/g           | 83                                            | 26.7% (22.2)     | 47 | 66.3% (30.8)    | -39.6%     | 0.30     |
| Detectable Roach                     | 83                                            | 44.5% (5.5)      | 47 | 31.9% (6.8)     | -12.6%     | 0.16     |
| Detectable Dust Mite                 | 83                                            | 39.7% (5.5)      | 47 | 28.1% (6.7)     | -11.6%     | 0.20     |
| Detectable Mouse                     | 83                                            | 47.5% (5.8)      | 47 | 65.8% (7.3)     | +18.3%     | 0.06     |

Values in each row are adjusted for baseline levels of the given outcome.

**Supplemental Table 3 – Differences in Maximum Symptom Days (MSD) according to intervention status at 6 months and baseline characteristics**

| Baseline Status                | Contact with Asthma Counselor Before 6 Months |            |    |             | Difference<br>Mean | p       | Interaction<br>p |
|--------------------------------|-----------------------------------------------|------------|----|-------------|--------------------|---------|------------------|
|                                | N                                             | No<br>Mean | N  | Yes<br>Mean |                    |         |                  |
| Parish                         |                                               |            |    |             |                    |         |                  |
| Jefferson                      | 19                                            | 2.26       | 32 | 2.05        | -0.21 (-2.4, 1.9)  | 0.84    | 0.04             |
| Orleans                        | 54                                            | 5.38       | 48 | 2.38        | -3.00 (-4.5, -1.5) | <0.0001 |                  |
| Taking Inhaled Corticosteroids |                                               |            |    |             |                    |         |                  |
| No                             | 32                                            | 3.44       | 34 | 1.70        | -1.74 (-3.6, 0.1)  | 0.06    | 0.41             |
| Yes                            | 41                                            | 5.43       | 46 | 2.66        | -2.76 (-4.4, -1.2) | <0.001  |                  |
| Outdoor Mold                   |                                               |            |    |             |                    |         |                  |
| <1000 spores/m <sup>3</sup>    | 4                                             | 7.90       | 26 | 2.61        | -5.26 (-9.3, -1.2) | 0.01    | 0.17             |
| ≥1000 spores/m <sup>3</sup>    | 69                                            | 4.36       | 54 | 2.08        | -2.28 (-3.7, -0.9) | 0.001   |                  |
| Bedroom Mold                   |                                               |            |    |             |                    |         |                  |
| <1000 spores/m <sup>3</sup>    | 51                                            | 4.29       | 66 | 2.26        | -2.03 (-3.5, -0.6) | 0.005   | 0.53             |
| ≥1000 spores/m <sup>3</sup>    | 22                                            | 5.18       | 14 | 2.20        | -2.98 (-5.6, -0.3) | 0.03    |                  |
| Total IgE                      |                                               |            |    |             |                    |         |                  |
| <100 KU/L                      | 18                                            | 4.64       | 24 | 2.49        | -2.15 (-4.6, 0.3)  | 0.08    | 0.88             |
| ≥100 KU/L                      | 51                                            | 4.53       | 51 | 2.16        | -2.37 (-3.9, -0.8) | 0.003   |                  |
| Detectable Mold IgE            |                                               |            |    |             |                    |         |                  |
| No                             | 38                                            | 5.27       | 43 | 2.22        | -3.06 (-4.8, -1.4) | <0.001  | 0.19             |
| Yes                            | 31                                            | 3.66       | 34 | 2.32        | -1.34 (-3.2, 0.6)  | 0.17    |                  |
| <i>Alternaria</i>              |                                               |            |    |             |                    |         |                  |
| <10 µg/g                       | 30                                            | 4.62       | 28 | 2.52        | -2.11 (-4.1, -0.1) | 0.04    | 0.85             |
| ≥10 µg/g                       | 42                                            | 4.47       | 52 | 2.12        | -2.35 (-3.9, -0.8) | 0.004   |                  |
| Detectable roach               |                                               |            |    |             |                    |         |                  |
| No                             | 55                                            | 4.49       | 66 | 2.09        | -2.40 (-3.8, -1.0) | <0.001  | 0.61             |
| Yes                            | 17                                            | 4.67       | 14 | 3.06        | -1.61 (-4.4, 1.2)  | 0.25    |                  |
| Detectable dust mite           |                                               |            |    |             |                    |         |                  |
| No                             | 48                                            | 4.62       | 51 | 2.76        | -1.86 (-3.4, -0.3) | 0.02    | 0.39             |
| Yes                            | 24                                            | 4.36       | 29 | 1.37        | -2.99 (-5.1, -0.9) | 0.006   |                  |
| Detectable mouse               |                                               |            |    |             |                    |         |                  |
| No                             | 25                                            | 3.55       | 35 | 2.22        | -1.34 (-3.3, 0.6)  | 0.19    | 0.27             |
| Yes                            | 47                                            | 5.05       | 45 | 2.29        | -2.76 (-4.3, -1.2) | <0.001  |                  |
